# Supplementary material
Source: publisher site journal article supplement (https://www.dovepress.com/article/574439)
Supplement: Supplementary file 1 [file 574439%20Revised%20Supplementary%20Material.docx]

**Supplementary Figure 1. A method flow diagram of** **MR analysis.**

**
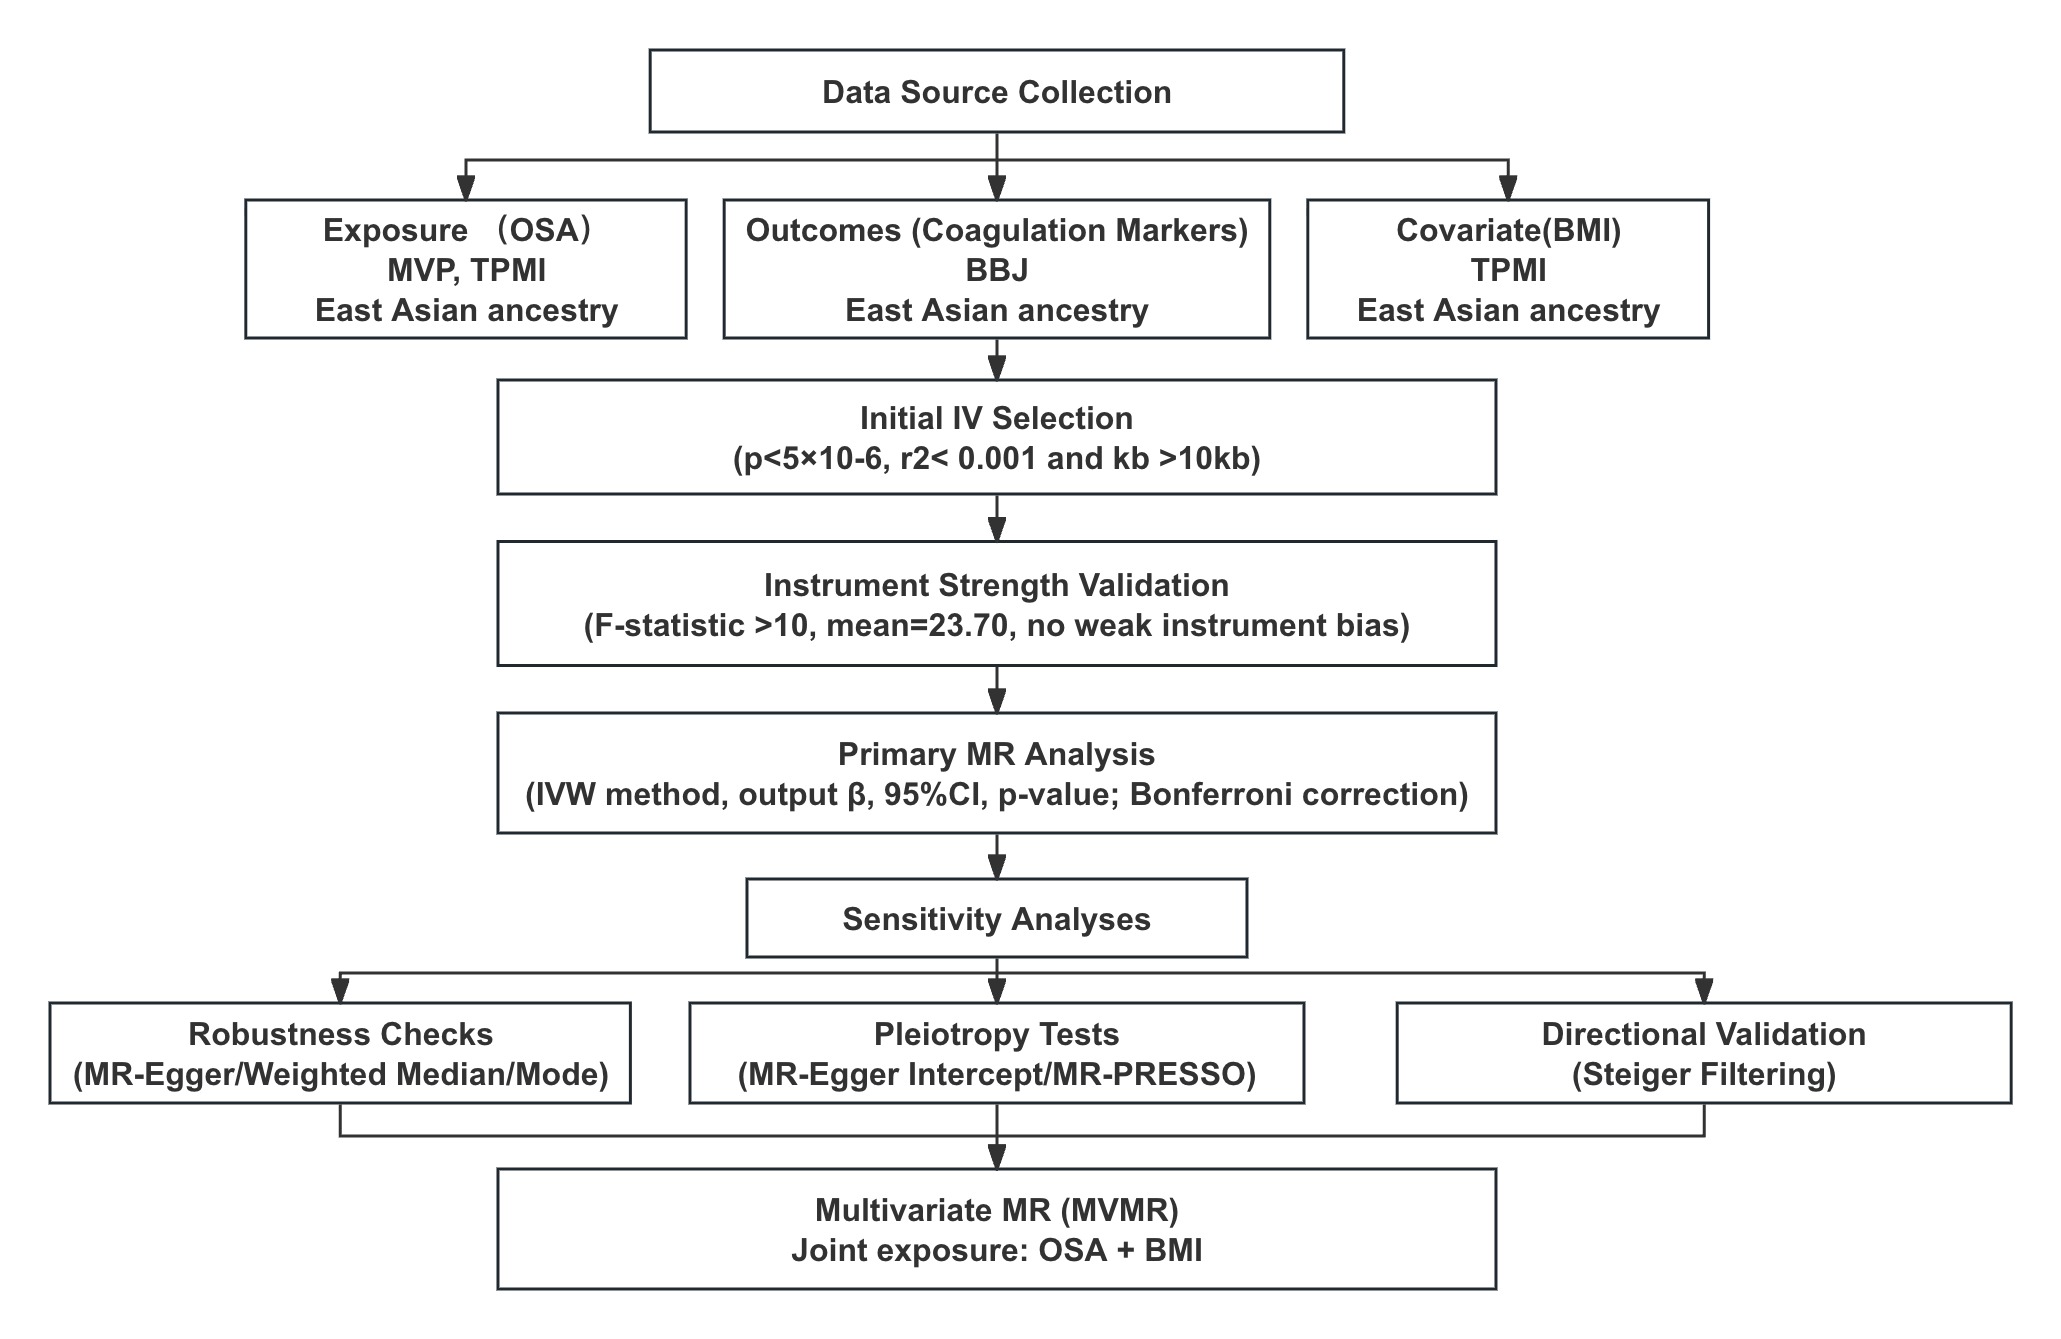
**

**Abbreviations:** SNPs, single-nucleotide polymorphism; MVP, Million Veteran Program; TPMI, Taiwan Precision Medicine Initiative.

**Supplementary Table 1. GWAS Study Traits and Demographics.**

| **ID** | **Trait** | **Sample size** | **Cohort** | **Ancestry** |
| --- | --- | --- | --- | --- |
| GCST90477484  TPMI:327.3  TPMI: BMI | Sleep apnea  Sleep apnea  Body mass index | 6,550  316,351  191,458 | Million Veteran Program  Taiwan Precision Medicine Initiative  Taiwan Precision Medicine Initiative | East Asian  East Asian  East Asian |
| bbj-a-7 | Activated partial thromboplastin time | 37,767 | BioBank Japan | East Asian |
| bbj-a-22 | Fibrinogen | 18,348 | BioBank Japan | East Asian |
| bbj-a-47 | Prothrombin time | 58,110 | BioBank Japan | East Asian |

**Abbreviations:** GWAS Genome-wide association study, SNPs single-nucleotide polymorphisms.

**Supplementary Table 2. Steiger filtering results of OSA on coagulation marker**

| **GWAS** | **Exposure** | **Outcome** | **R²_exposure** | **R²_outcome** | **Correct_causal_direction** |
| --- | --- | --- | --- | --- | --- |
| **TPMI:327.3** | **OSA** | **APTT** | **1.51E-04** | **1.92E-05** | **TRUE** |
|  | **OSA** | **Fibrinogen** | **1.51E-04** | **1.30E-05** | **TRUE** |
|  | **OSA** | **PT** | **1.51E-04** | **1.12E-04** | **TRUE** |
| **GCST90477484** | **OSA** | **APTT** | **1.44E-02** | **8.93E-05** | **TRUE** |
|  | **OSA** | **Fibrinogen** | **1.44E-02** | **3.06E-04** | **TRUE** |
|  | **OSA** | **PT** | **1.44E-02** | **1.09E-04** | **TRUE** |

**Abbreviations: OSA, Obstructive sleep apnea; GWAS, Genome-wide association study; APTT, Activated Partial Thromboplastin Time; Fib, Fibrinogen; PT, Prothrombin Time. R²_exposure and R²_outcome denote the variance explained by the instrumental SNPs in the exposure and the outcome, respectively.**
